# Supplementary material for: Human anogenital monocyte-derived dendritic cells and langerin+cDC2 are major HIV target cells
Source: PubMed Central journal article supplement (PMC8042121; doi:10.1038/s41467-021-22375-x), 2021-04-12
Supplement: 41467_2021_22375_MOESM1_ESM.pdf [file 41467_2021_22375_MOESM1_ESM.pdf]

# Supplementary Figure 1

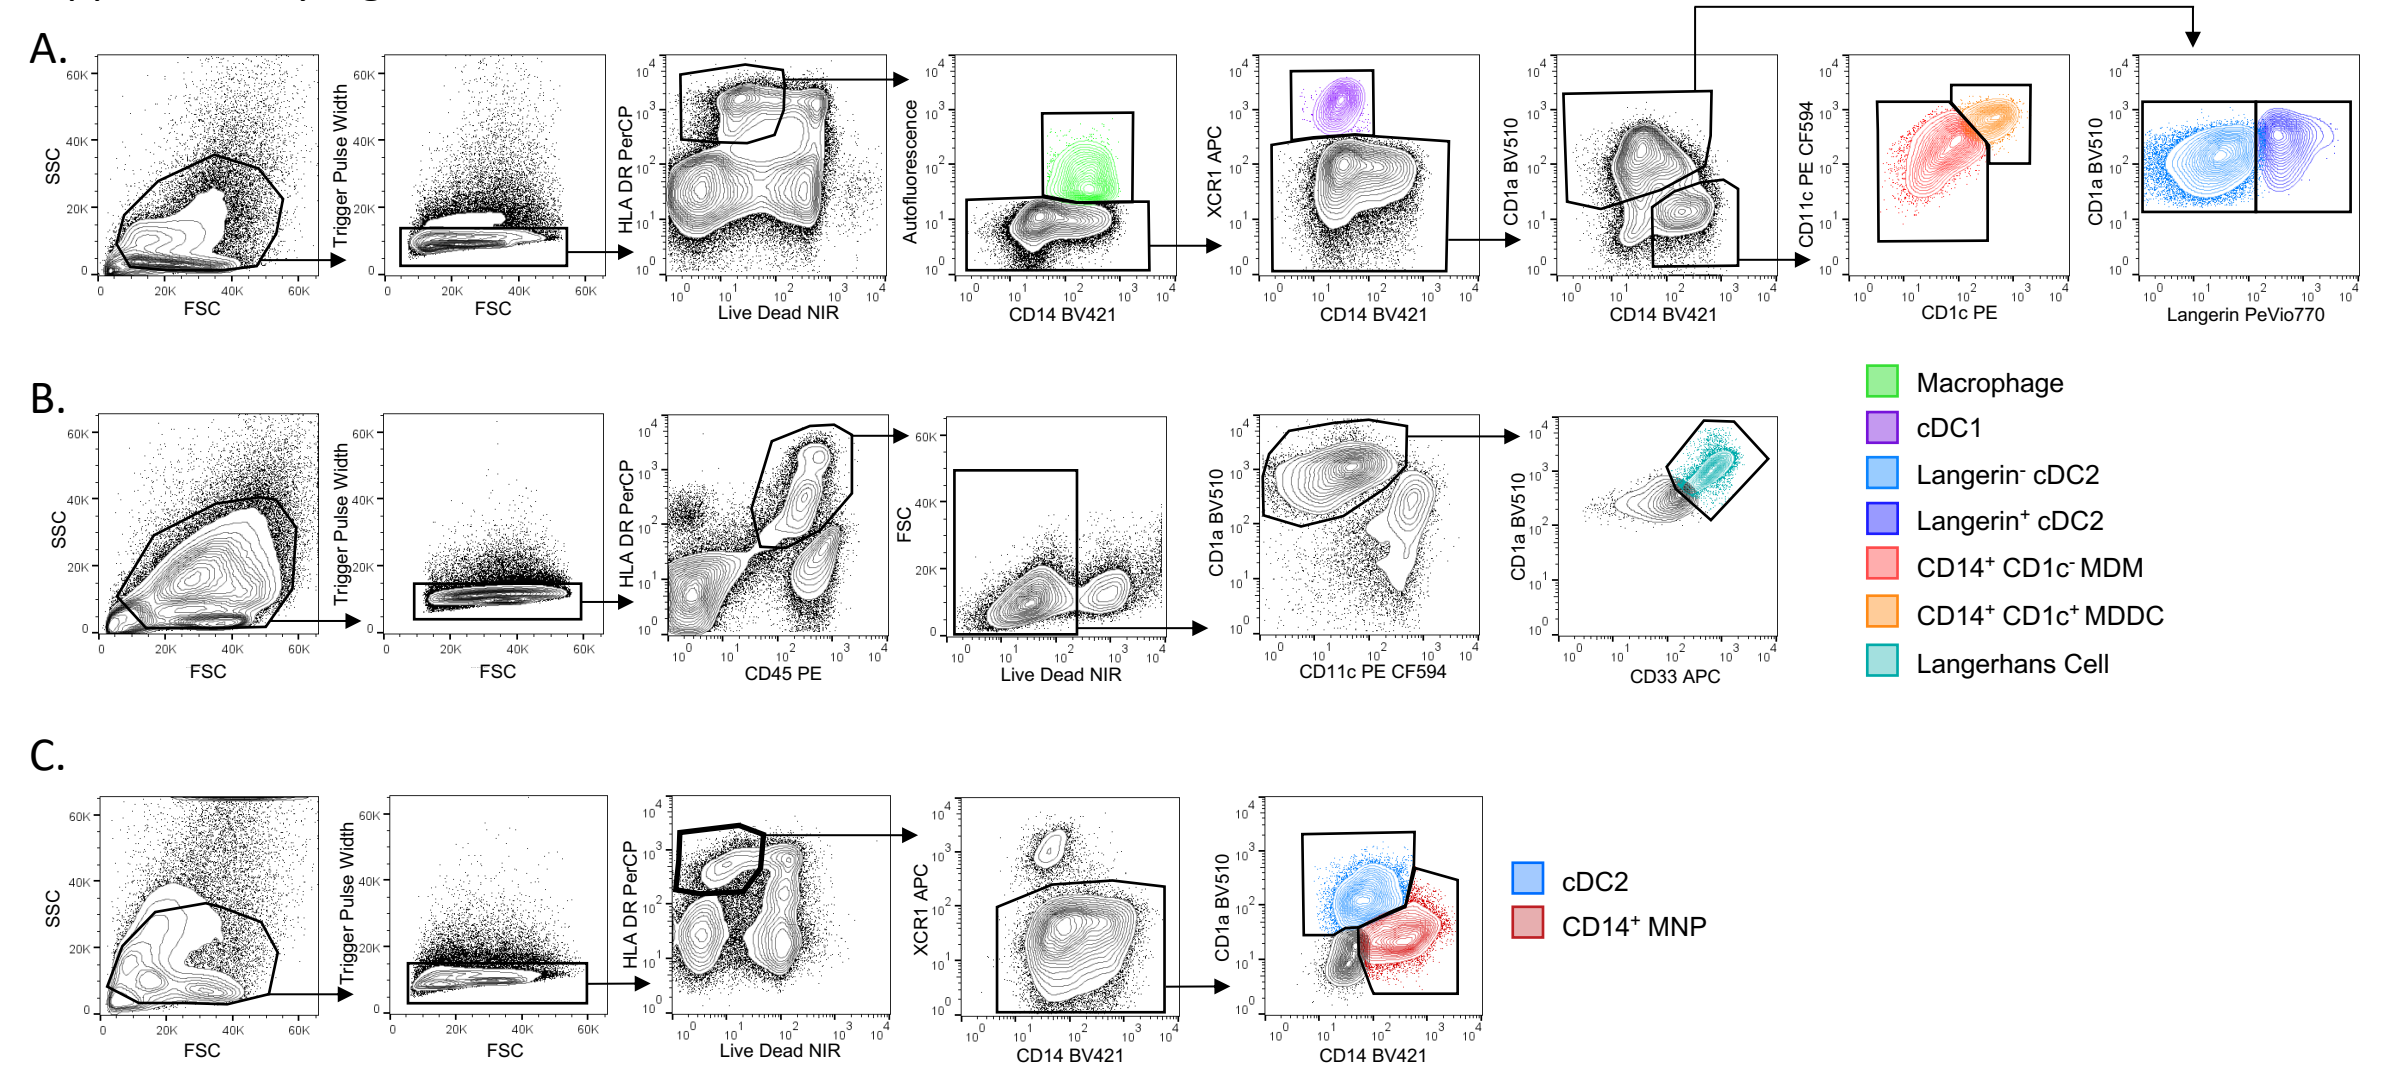

**Supplementary Figure 1. Gating strategies for FACS sorting. A.** Gating strategy to sort sub epithelial mononuclear phagocyte subsets including CD14<sup>+</sup> autofluorescent macrophages (green), XCR1<sup>+</sup> CD14<sup>-</sup> cDC1 (purple), CD14<sup>+</sup> CD1c<sup>-</sup> MDM (red), CD14<sup>+</sup> CD1c<sup>+</sup> MDDC (orange), langerin<sup>-</sup> cDC2 (light blue), langerin<sup>+</sup> cDC2 (dark blue). Gating was used for RNAseq and HIV functional assays in figures 3A/B/D, 4A/C/D, 6A/B, 7C/E, 8C and 9C. **B.** Gating strategy to sort abdominal skin epidermal CD1a<sup>+</sup> CD11c<sup>-</sup> Langerhans cells (teal). Gating was used for RNAseq in figures 3A/D. **C.** Gating strategy for sub epithelial XCR1<sup>-</sup> CD14<sup>-</sup> CD1a<sup>+</sup> cDC2 (blue) and XCR1<sup>-</sup> CD1a<sup>-</sup> CD14<sup>+</sup> MNP (maroon). Gating was used for HIV functional assays in figures 6B, 7D and 9D. HLA DR<sup>+</sup> Live cells (bold gate) were sorted for HIV uptake assays in figures 5A/C/E and 8A.

| <b>Supplementary table 1. RNAseq Primers</b> |                                                   |
|----------------------------------------------|---------------------------------------------------|
| oligo-dT Primer                              | 5'-AAGCAGTGGTATCAACGCAGAGTACT <sub>30</sub> VN-3' |
| TSO Primer                                   | 5'-AAGCAGTGGTATCAACGCAGAGTACATrGrG+G-3'           |
| ISPCR Primer                                 | 5'-AAGCAGTGGTATCAACGCAGAGT-3'                     |
